# Supplementary material
Source: MDPI journal article supplement (https://www.mdpi.com/2072-4292/7/8/9655)
Supplement: s1 [file s1]

**Supplemental Table 1.**  User’s and Producers accuracies for the primary reference label.

| **Classification** | | | **User’s accuracy** | | | | | | | | | **Producers accuracy** | | | | | | | | |
| --- | --- | --- | --- | --- | --- | --- | --- | --- | --- | --- | --- | --- | --- | --- | --- | --- | --- | --- | --- | --- |
| **Algorithm** | **Allocation** | **Class** | **Wat** | **Dev** | **DF** | **EF** | **Shb** | **Grs** | **Past** | **Crop** | **Wet** | **Wat** | **Dev** | **DF** | **EF** | **Shb** | **Grs** | **Past** | **Crop** | **Wet** |
| C5.0 | Homogen | Random | 80.0 | 54.0 | 82.6 | 26.0 | 78.3 | 28.8 | 34.8 | 58.8 | 8.6 | 86.7 | 87.1 | 23.6 | 22.2 | 46.6 | 47.9 | 19.0 | 50.5 | 52.2 |
|  |  | Area | 81.4 | 70.7 | 76.0 | 22.6 | 76.1 | 33.9 | 31.0 | 59.0 | 17.7 | 80.0 | 79.4 | 29.5 | 52.2 | 50.0 | 44.8 | 50.4 | 42.2 | 47.8 |
|  |  | Equal | 78.1 | 67.9 | 91.0 | 24.0 | 70.2 | 40.8 | 34.4 | 63.4 | 10.5 | 89.2 | 80.6 | 18.9 | 45.6 | 67.4 | 41.7 | 52.1 | 42.2 | 43.5 |
|  | Uniform | Random | 80.0 | 85.6 | 70.3 | 24.4 | 83.7 | 23.4 | 37.0 | 57.8 | 18.6 | 93.3 | 72.9 | 44.1 | 42.2 | 40.4 | 52.1 | 38.8 | 50.9 | 39.1 |
|  |  | Area | 77.8 | 82.2 | 76.3 | 23.8 | 78.4 | 29.5 | 38.1 | 62.4 | 19.0 | 87.5 | 77.4 | 41.9 | 45.6 | 55.1 | 51.0 | 43.8 | 51.8 | 43.5 |
|  |  | Equal | 77.7 | 78.3 | 82.1 | 23.6 | 74.6 | 31.5 | 38.3 | 64.5 | 16.0 | 95.8 | 81.3 | 35.7 | 41.1 | 59.6 | 49.0 | 42.1 | 49.1 | 52.2 |
|  | Random | Random | 79.3 | 90.5 | 77.6 | 24.6 | 83.9 | 23.0 | 36.9 | 60.8 | 20.6 | 89.2 | 67.7 | 47.2 | 45.6 | 41.0 | 51.0 | 45.5 | 51.8 | 43.5 |
|  |  | Area | 78.6 | 82.8 | 73.7 | 26.3 | 84.3 | 25.7 | 37.7 | 62.1 | 19.1 | 91.7 | 71.6 | 45.3 | 44.4 | 48.3 | 55.2 | 40.5 | 49.5 | 45.7 |
|  |  | Equal | 70.0 | 82.3 | 80.8 | 25.0 | 71.1 | 30.5 | 39.6 | 66.0 | 13.2 | 99.2 | 78.1 | 31.4 | 42.2 | 59.6 | 53.1 | 45.5 | 46.3 | 41.3 |
| RF-C | Homogen | Random | 80.2 | 50.6 | 78.3 | 27.6 | 80.4 | 31.2 | 38.8 | 61.1 | 9.4 | 87.5 | 87.1 | 25.8 | 23.3 | 46.1 | 51.0 | 21.5 | 49.1 | 54.3 |
|  |  | Area | 80.2 | 66.5 | 80.8 | 24.3 | 74.6 | 32.6 | 30.5 | 61.5 | 15.4 | 80.8 | 80.6 | 30.1 | 50.0 | 49.4 | 44.8 | 47.9 | 44.0 | 45.7 |
|  |  | Equal | 80.5 | 68.6 | 92.2 | 27.7 | 73.9 | 43.8 | 34.6 | 63.9 | 11.8 | 89.2 | 83.2 | 22.0 | 43.3 | 68.5 | 47.9 | 51.2 | 43.1 | 54.3 |
|  | Uniform | Random | 80.4 | 87.9 | 73.5 | 25.2 | 84.1 | 23.7 | 39.2 | 60.1 | 20.0 | 92.5 | 74.8 | 46.6 | 45.6 | 38.8 | 55.2 | 38.8 | 50.5 | 43.5 |
|  |  | Area | 78.7 | 83.8 | 75.7 | 24.8 | 86.4 | 29.5 | 36.9 | 62.6 | 19.1 | 89.2 | 80.0 | 43.5 | 44.4 | 57.3 | 54.2 | 39.7 | 52.3 | 45.7 |
|  |  | Equal | 77.0 | 80.6 | 81.3 | 23.6 | 80.0 | 31.1 | 40.3 | 61.5 | 15.9 | 95.0 | 80.6 | 33.9 | 43.3 | 62.9 | 52.1 | 43.0 | 47.7 | 50.0 |
|  | Random | Random | 79.9 | 91.7 | 75.5 | 26.4 | 83.8 | 22.0 | 36.7 | 62.9 | 22.6 | 92.5 | 71.0 | 48.8 | 47.8 | 32.0 | 55.2 | 42.1 | 50.5 | 45.7 |
|  |  | Area | 79.0 | 84.8 | 77.1 | 26.3 | 85.3 | 25.2 | 37.9 | 62.7 | 20.8 | 90.8 | 75.5 | 46.0 | 46.7 | 48.9 | 54.2 | 41.3 | 50.9 | 45.7 |
|  |  | Equal | 72.0 | 84.9 | 81.2 | 25.3 | 82.3 | 28.8 | 39.0 | 62.8 | 14.8 | 98.3 | 80.0 | 33.5 | 45.6 | 60.1 | 55.2 | 43.8 | 45.0 | 43.5 |
| Cubist | Random-50 |  | 79.0 | 89.7 | 74.9 | 23.2 | 80.8 | 26.3 | 37.6 | 61.2 | 20.4 | 90.8 | 78.7 | 42.5 | 43.3 | 47.2 | 54.2 | 41.3 | 50.0 | 47.8 |
|  | Random-0 |  | 80.2 | 92.8 | 72.5 | 22.5 | 75.0 | 23.8 | 38.6 | 61.9 | 20.7 | 84.2 | 74.8 | 45.0 | 44.4 | 32.0 | 55.2 | 46.3 | 51.4 | 41.3 |
|  | Uniform |  | 81.2 | 86.1 | 83.6 | 25.2 | 76.0 | 32.3 | 38.1 | 64.0 | 18.5 | 90.0 | 83.9 | 39.4 | 45.6 | 62.4 | 52.1 | 46.3 | 48.2 | 54.3 |
| RF-R | Random-50 |  | 79.7 | 90.8 | 77.2 | 23.3 | 85.2 | 24.4 | 37.3 | 62.7 | 19.0 | 91.7 | 76.8 | 44.1 | 45.6 | 38.8 | 57.3 | 41.3 | 50.9 | 41.3 |
|  | Random-0 |  | 80.3 | 91.6 | 72.0 | 23.9 | 82.0 | 22.9 | 37.0 | 61.1 | 19.8 | 88.3 | 70.3 | 46.3 | 47.8 | 28.1 | 56.3 | 41.3 | 51.8 | 39.1 |
|  | Uniform |  | 80.9 | 84.7 | 80.4 | 23.8 | 80.1 | 33.1 | 38.8 | 65.1 | 19.1 | 91.7 | 81.9 | 39.4 | 44.4 | 63.5 | 53.1 | 44.6 | 50.5 | 54.3 |

**Supplemental Table 2.**  User’s and Producers accuracies for the primary and alternative reference label.

| **Classification** | | | **User’s accuracy** | | | | | | | | | **Producers accuracy** | | | | | | | | |
| --- | --- | --- | --- | --- | --- | --- | --- | --- | --- | --- | --- | --- | --- | --- | --- | --- | --- | --- | --- | --- |
| **Algorithm** | **Allocation** | **Class** | **Wat** | **Dev** | **DF** | **EF** | **Shb** | **Grs** | **Past** | **Crop** | **Wet** | **Wat** | **Dev** | **DF** | **EF** | **Shb** | **Grs** | **Past** | **Crop** | **Wet** |
| C5.0 | Homogen | Random | 83.1 | 56.4 | 89.1 | 45.5 | 84.0 | 48.8 | 66.7 | 66.3 | 20.1 | 89.3 | 88.1 | 27.5 | 40.7 | 54.9 | 66.7 | 36.7 | 59.9 | 74.7 |
|  |  | Area | 83.9 | 71.8 | 85.6 | 39.9 | 81.2 | 51.2 | 57.4 | 67.3 | 35.5 | 83.2 | 82.2 | 37.8 | 73.5 | 56.2 | 66.3 | 73.9 | 53.8 | 68.8 |
|  |  | Equal | 81.8 | 69.6 | 94.0 | 42.7 | 76.6 | 59.2 | 59.0 | 72.4 | 24.7 | 91.1 | 83.1 | 23.2 | 68.9 | 74.4 | 63.0 | 70.1 | 52.2 | 69.1 |
|  | Uniform | Random | 83.6 | 87.1 | 82.2 | 42.9 | 86.0 | 42.1 | 67.7 | 66.1 | 37.1 | 95.1 | 76.2 | 54.1 | 65.7 | 48.4 | 75.6 | 67.7 | 61.1 | 64.3 |
|  |  | Area | 80.7 | 84.9 | 84.2 | 43.0 | 83.2 | 51.2 | 69.8 | 71.3 | 40.0 | 90.1 | 80.5 | 51.6 | 69.2 | 66.7 | 75.9 | 70.3 | 62.6 | 66.7 |
|  |  | Equal | 81.8 | 81.4 | 89.3 | 40.8 | 80.3 | 55.0 | 69.9 | 72.9 | 34.0 | 97.6 | 84.5 | 43.3 | 64.6 | 70.8 | 72.6 | 67.9 | 60.2 | 76.1 |
|  | Random | Random | 83.7 | 93.1 | 88.3 | 44.3 | 88.5 | 44.6 | 65.1 | 69.4 | 42.3 | 92.6 | 70.6 | 57.7 | 71.2 | 50.7 | 76.0 | 74.6 | 64.5 | 68.3 |
|  |  | Area | 81.4 | 85.1 | 84.3 | 43.4 | 86.3 | 47.1 | 67.7 | 71.8 | 37.3 | 92.7 | 76.0 | 54.6 | 67.3 | 57.5 | 77.6 | 68.8 | 61.3 | 69.5 |
|  |  | Equal | 74.7 | 86.4 | 90.4 | 43.4 | 78.5 | 54.5 | 71.9 | 75.2 | 30.6 | 100.0 | 81.4 | 39.5 | 66.0 | 73.1 | 79.1 | 71.4 | 57.8 | 69.8 |
| RF-C | Homogen | Random | 83.2 | 53.2 | 85.8 | 47.4 | 84.3 | 50.3 | 67.2 | 70.9 | 21.1 | 89.3 | 88.2 | 30.4 | 42.4 | 53.4 | 67.5 | 38.8 | 58.5 | 76.7 |
|  |  | Area | 83.5 | 69.1 | 88.3 | 43.8 | 80.5 | 51.5 | 59.5 | 71.2 | 33.8 | 82.8 | 83.9 | 38.0 | 74.3 | 57.6 | 69.4 | 72.9 | 56.1 | 70.8 |
|  |  | Equal | 83.5 | 71.8 | 97.4 | 47.5 | 79.4 | 62.9 | 64.8 | 74.1 | 24.6 | 91.0 | 86.0 | 27.2 | 66.3 | 76.6 | 71.0 | 73.4 | 54.8 | 75.4 |
|  | Uniform | Random | 84.1 | 89.4 | 84.8 | 44.8 | 86.6 | 43.3 | 72.5 | 68.9 | 44.0 | 94.3 | 77.6 | 57.3 | 71.6 | 46.7 | 78.2 | 68.0 | 62.4 | 72.1 |
|  |  | Area | 82.4 | 86.5 | 84.3 | 45.3 | 90.7 | 52.3 | 69.2 | 71.4 | 42.7 | 92.6 | 83.1 | 53.6 | 69.5 | 68.2 | 78.0 | 68.2 | 64.4 | 71.2 |
|  |  | Equal | 81.1 | 84.5 | 88.8 | 42.4 | 85.0 | 55.3 | 70.5 | 71.0 | 35.2 | 96.8 | 84.0 | 41.5 | 69.3 | 75.8 | 76.1 | 67.9 | 59.1 | 76.1 |
|  | Random | Random | 83.5 | 94.2 | 85.6 | 47.2 | 86.8 | 41.9 | 66.9 | 72.0 | 45.2 | 95.1 | 74.3 | 59.5 | 72.6 | 39.3 | 78.9 | 71.5 | 62.7 | 72.4 |
|  |  | Area | 82.6 | 87.7 | 87.0 | 45.0 | 88.2 | 48.1 | 69.7 | 71.8 | 42.6 | 92.7 | 79.1 | 56.0 | 69.9 | 60.4 | 77.3 | 70.2 | 63.5 | 70.5 |
|  |  | Equal | 76.2 | 89.0 | 88.7 | 42.6 | 86.9 | 53.3 | 72.1 | 71.8 | 34.1 | 99.2 | 83.3 | 41.3 | 68.3 | 73.4 | 79.7 | 71.0 | 56.6 | 71.9 |
| Cubist | Random-50 |  | 84.1 | 92.6 | 87.4 | 41.7 | 86.5 | 49.0 | 69.2 | 70.2 | 42.6 | 92.8 | 81.8 | 53.2 | 70.0 | 59.6 | 79.5 | 69.7 | 62.8 | 74.2 |
|  | Random-0 |  | 84.1 | 94.4 | 82.5 | 40.4 | 80.3 | 43.5 | 68.3 | 70.7 | 44.6 | 86.2 | 78.7 | 55.0 | 70.6 | 40.7 | 78.2 | 73.3 | 64.3 | 65.1 |
|  | Uniform |  | 84.2 | 89.4 | 92.1 | 43.6 | 82.2 | 56.1 | 68.7 | 73.2 | 40.0 | 92.6 | 87.1 | 48.1 | 71.7 | 75.0 | 78.4 | 73.2 | 60.3 | 75.0 |
| RF-R | Random-50 |  | 83.3 | 93.1 | 85.9 | 40.9 | 87.7 | 43.6 | 69.4 | 72.3 | 42.0 | 93.5 | 79.7 | 53.7 | 69.2 | 46.7 | 79.0 | 69.9 | 63.1 | 70.0 |
|  | Random-0 |  | 84.1 | 93.3 | 84.1 | 42.8 | 85.2 | 41.9 | 68.1 | 69.7 | 44.0 | 91.0 | 73.0 | 57.6 | 73.3 | 34.7 | 78.6 | 71.3 | 64.2 | 67.8 |
|  | Uniform |  | 83.8 | 87.3 | 89.9 | 42.9 | 85.1 | 56.5 | 69.8 | 73.4 | 39.7 | 91.9 | 85.1 | 49.1 | 68.6 | 75.5 | 77.0 | 71.9 | 62.3 | 76.5 |
